# Supplementary material for: Sponge-Derived Streptomyces variabilis Modulates Gene Expression and Immunity in Caenorhabditis elegans: Insights Into Protection From Vibrio parahaemolyticus
Source: Research Square preprint supplement (doi:10.21203/rs.3.rs-7659459/v1), 2025-12-04
Supplement: Supplementary file 1 [file 0c2081a4e5e62bed7e5253e5.docx]

**Sponge-Derived *Streptomyces variabilis* Modulates Gene Expression and Immunity in *Caenorhabditis elegans*: Insights Into Protection From *Vibrio parahaemolyticus***

**Journal Name**

Current Microbiology

**Author Names**

Owen Brylle Acostaa*, Rosanna Ramosa, Francis Reuben Paul Padayaob, Carl Raymond Consuegraa, Norman Quilantanga, Reyna Marie Therese Sancheza,c, Mary Hannah Rose Padayaod, Kenji Arakawad, and Jonie Yeea*

**Affiliations**

aApplied Microbiology and Molecular Biology Laboratory, Department of Biology, University of San Carlos, Cebu City 6000, Philippines

bDepartment of Mathematics and Natural Sciences - Biology, Cebu Institute of Technology - University, Cebu City 6000, Philippines

cDepartment of Science and Technology, Science Education Institute, Taguig City, Metro Manila 1631, Philippines

dProgram of Biotechnology, Graduate School of Integrated Sciences for Life, Hiroshima University, Higashi-Hiroshima 739-8526, Japan

***Corresponding authors:** [jcyee@usc.edu.ph](mailto:jcyee@usc.edu.ph)

owenbrylleacosta@gmail.com

**
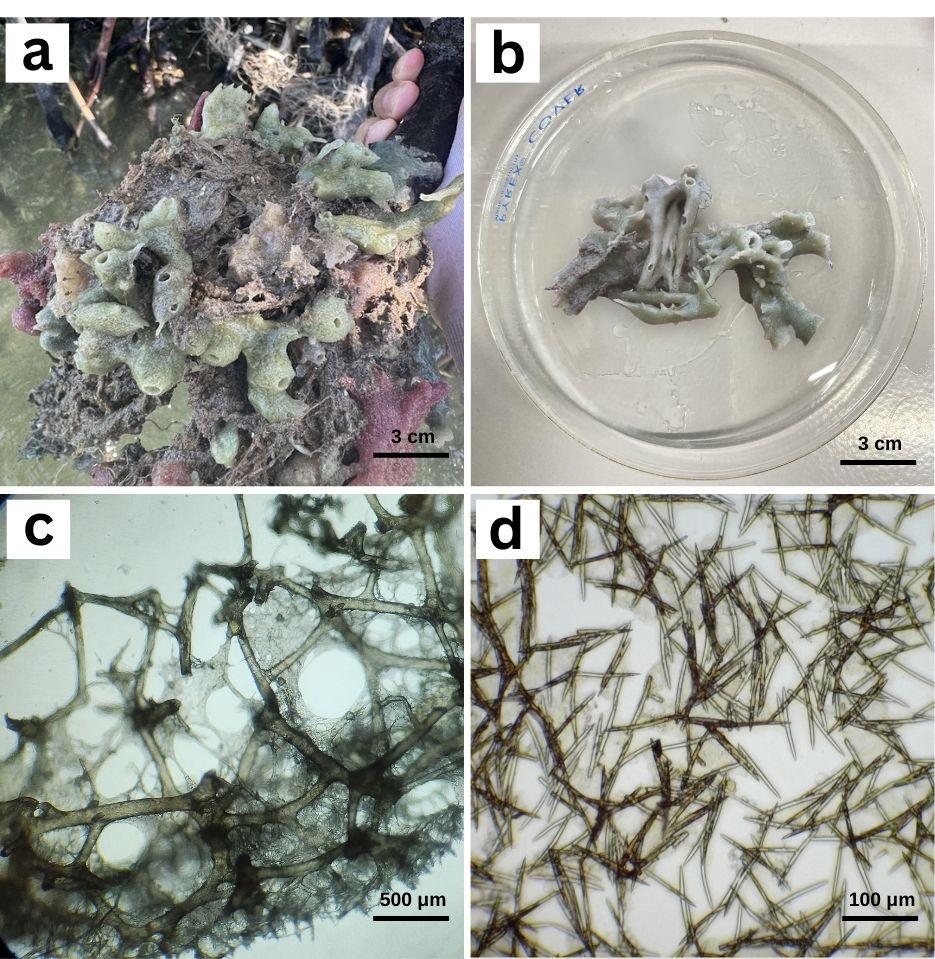
**

**Figure S1** The sponge *Haliclona sp*. in the mangrove ecosystem of Sta. Fe, Bantayan Island, Cebu, Philippines (a); collected sample for bacterial isolation (b); details of spongin fibers (c); spicules (d)

**
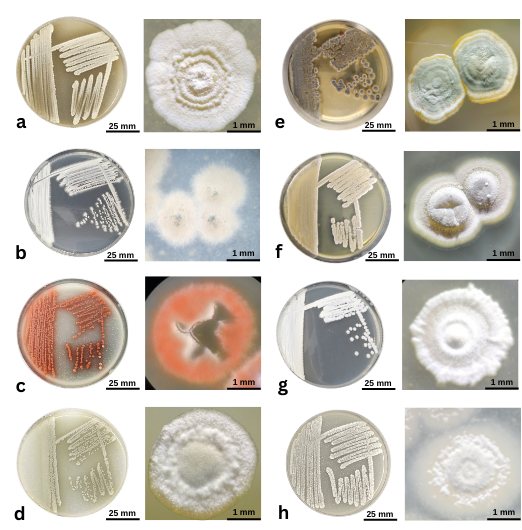
**

**Figure S2** Colony morphology of mangrove sponge-associated actinomycete species (MSAS): *Streptomyces champavatii* (MSAS1) (a), *Nocardiopsis synnemataformans* (MSAS3) (b), *S. wuyuanensis* (MSAS4) (c), *S. guorgerotti* (MSAS5) (d), *S. griseorubens* (MSAS6) (e), *S. variabilis* (MSAS7)(f), *N. alborubida* (MSAS9) (g), and *S. carpaticus* (MSAS12) (h)

**Table S1.** Morphological characterization of presumptive actinomycete species isolated from the mangrove sponge *Halicona* sp.

| **Isolate Code** | **Colony Morphology** | | | **Mycelium Color** | | **Diffusible Pigments** | **Spore Morphology** |
| --- | --- | --- | --- | --- | --- | --- | --- |
| **Shape** | **Margin** | **Elevation** | **Aerial** | **Substrate** |
| MSAS1 | Round | Filamentous | Raised | White | Yellowish brown | Negative | Rectiflexibiles |
| MSAS3 | Round | Entire | Convex | White | Yellow | Negative | Straight |
| MSAS4 | Round | Entire | Convex | White | Red | Reddish brown | Spiral |
| MSAS5 | Round | Filamentous | Raised | White | Dark brown | Brown | Rectiflexibiles |
| MSAS6 | Irregular | Filamentous | Raised | Grey | Yellow | Negative | Spiral |
| MSAS7 | Rounds | Entire | Convex | Grey | Brown | Negative | Spiral |
| MSAS9 | Curled | Filamentous | Umbonate | White | Brown | Negative | Straight |
| MSAS12 | Round | Entire | Raised | Grey | Dark brown | Brown | Spiral |
